# Supplementary material
Source: Springer Nature journal article supplement (https://www.springermedizin.de/resource/supplementary/13063_2008_296_MOESM2_ESM.pdf/9618082)
Supplement: MOESM2 [file 9618082]

# Transvaginal Ultrasonography

Preoperative   
  3 months   
  6 months   
  9 months   
  12 months

MCD    |\_\_|\_\_| day (LMP : (|\_\_|\_\_| y |\_\_|\_\_| mons |\_\_|\_\_| day)

|                |                                         |                                                                   |
|----------------|-----------------------------------------|-------------------------------------------------------------------|
| <b>Fibroid</b> | Length (cm)                             | (1)  __ __ .  __ __  , (2)  __ __ .  __ __  , (3)  __ __ .  __ __ |
|                | Width (cm)                              | (1)  __ __ .  __ __  , (2)  __ __ .  __ __  , (3)  __ __ .  __ __ |
|                | Depth (cm)                              | (1)  __ __ .  __ __  , (2)  __ __ .  __ __  , (3)  __ __ .  __ __ |
|                | Volume <sup>1)</sup> (cm <sup>3</sup> ) | __ __ __ __ .  __ __                                              |

|               |                                         |                      |
|---------------|-----------------------------------------|----------------------|
| <b>Uterus</b> | Length (cm)                             | __ __ .  __ __       |
|               | Width (cm)                              | __ __ .  __ __  ,    |
|               | Depth (cm)                              | __ __ .  __ __  ,    |
|               | Volume <sup>1)</sup> (cm <sup>3</sup> ) | __ __ __ __ .  __ __ |

|              |                    |                                                                                                                                                                                          |
|--------------|--------------------|------------------------------------------------------------------------------------------------------------------------------------------------------------------------------------------|
| <b>Ovary</b> | <b>Right ovary</b> | Volume <sup>2)</sup> (cm <sup>3</sup> )     __ __ __ __ .  __ __                                                                                                                         |
|              |                    | <input type="checkbox"/> Cyst <input type="checkbox"/> Solid <input type="checkbox"/> Papillary projection <input type="checkbox"/> Septation<br><input type="checkbox"/> Others : _____ |
|              |                    | <b>Clinical impression</b><br><input type="checkbox"/> Within normal range<br><input type="checkbox"/> Abnormal : _____                                                                  |
|              | <b>Left ovary</b>  | Volume <sup>2)</sup> (cm <sup>3</sup> )     __ __ __ __ .  __ __                                                                                                                         |
|              |                    | <input type="checkbox"/> Cyst <input type="checkbox"/> Solid <input type="checkbox"/> Papillary projection <input type="checkbox"/> Septation<br><input type="checkbox"/> Others : _____ |
|              |                    | <b>Clinical impression</b><br><input type="checkbox"/> Within normal range<br><input type="checkbox"/> Abnormal : _____                                                                  |

1) Fibroid volume : Length × Width × Depth × 0.5233 : total sum { (1)+(2)+(3) }

2) Uterine and ovarian volume : Length × Width × Depth × 0.5233
